# Supplementary material for: Maternal DCAF13 Regulates Chromatin Tightness to Contribute to Embryonic Development
Source: PubMed Central journal article supplement (PMC6472424; doi:10.1038/s41598-019-42179-w), 2019-04-18
Supplement: 41598_2019_42179_MOESM1_ESM.pdf [file 41598_2019_42179_MOESM1_ESM.pdf]

# **Maternal DCAF13 Regulates Chromatin Tightness to Contribute to Embryonic Development**

**Yang Liu<sup>1#</sup>, Long-Wen Zhao<sup>2#</sup>, Jingling Shen<sup>1</sup>, Heng-Yu Fan<sup>2</sup>, Yan Jin<sup>1\*</sup>**

<sup>1</sup> Laboratory of Medical Genetics, Harbin Medical University, Harbin, China.

<sup>2</sup> Life Sciences Institute, Zhejiang University, Hangzhou 310058, China

<sup>#</sup>These authors contributed equally to this work.

## **\*Corresponding authors:**

Dr. Yan Jin, Laboratory of Medical Genetics, Harbin Medical University, Harbin, China. Tel: 86-451-86674798; E-mail: [jinyan@ems.hrbmu.edu.cn](mailto:jinyan@ems.hrbmu.edu.cn)

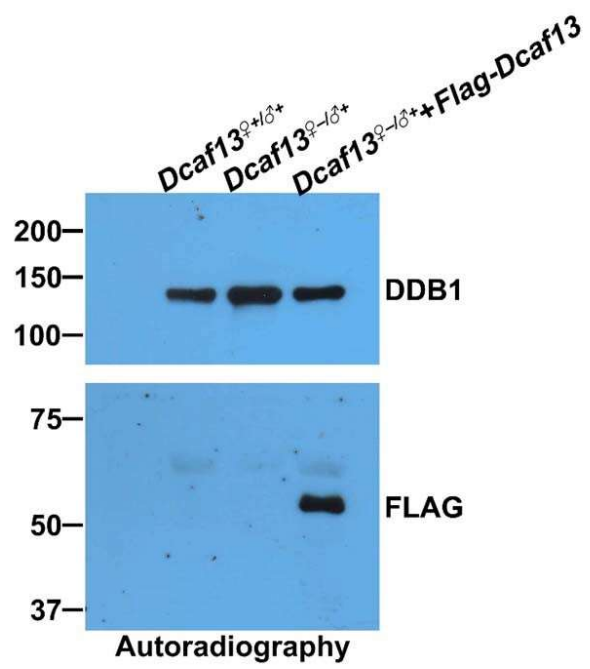

Supplementary Figure S1: Uncropped scans of the Western blot results in Fig. 2H.

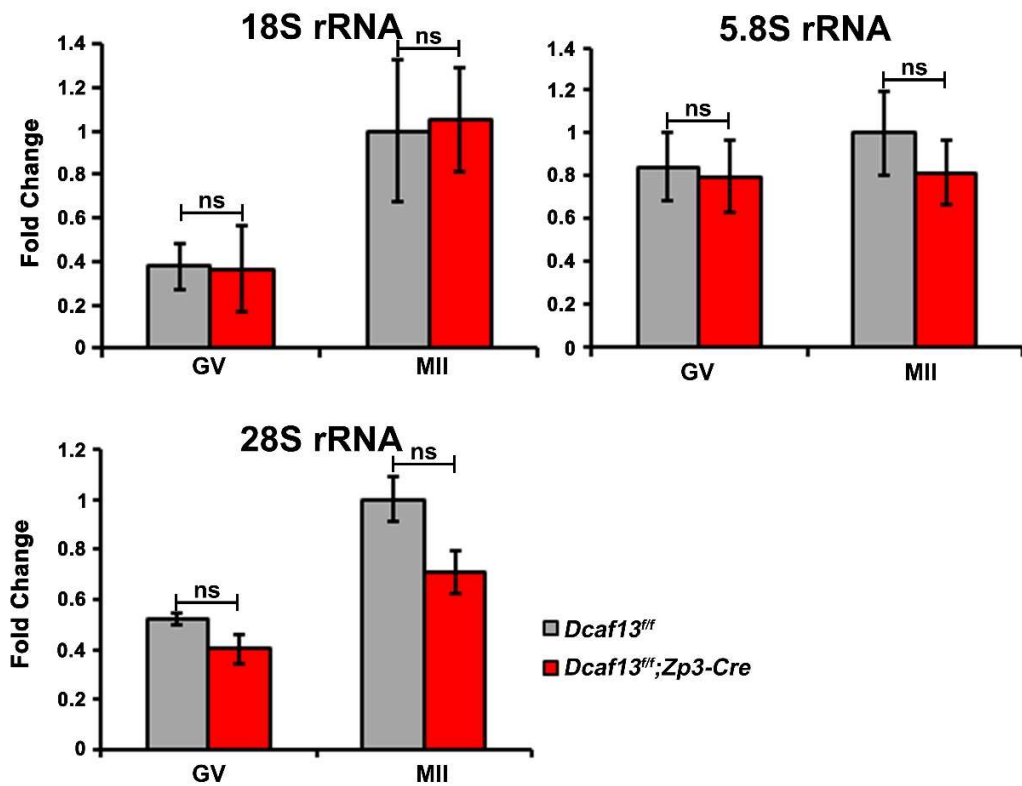

**Supplementary Figure S2: Graphical representation of the mean expression level  $\pm$  standard error of the mean (SEM) by reverse transcription polymerase chain reaction (RT-PCR) for several ribosomal RNAs in *Dcaf13<sup>fl/fl</sup>* (in gray) and *Dcaf13<sup>fl/fl</sup>;Zp3-Cre* (in red) oocytes. ns: statistically nonsignificant ( $p > 0.05$ ).**
